# Supplementary material for: Catalytic and filterable polyester-filter membrane electrode with a high performance carbon foam–Fe–Co catalyst improved electricity generation and waste-water treatment in MBR–MFC
Source: Royal Society of Chemistry journal article supplement (doi:10.1039/c5ra05965h), 2015-01-01
Supplement: c5ra05965h1.pdf [file c5ra05965h1.pdf]

1 Catalytic and filterable polyester-filter membrane electrode with a high performance

2 Carbon foam-Fe-Co catalyst improved electricity generation and waste-water

3 treatment in MBR-MFC

4 Tingting Yu<sup>a</sup>, Lifen Liu<sup>ab\*</sup>, Qiao Yang<sup>b</sup>, Jing Song<sup>a</sup>, Fenglin Yang<sup>a</sup>

5

## 6 **Supplementary material**

### 7 **For the comparison of different catalysts in CV curves**

8 It can be seen that the electrochemical activity of the Carbon foam-Fe-Co is much

9 higher than the PANI and Pt-C loaded on glassy carbon electrode from Fig. S1. To

10 evaluate the stability of the Carbon foam-Fe-Co, the CV was scanned for three circles.

11 As shown in Fig. S1, all the peaks become a little weak. Therefore, the Carbon foam-

12 Fe-Co catalyst is stable.

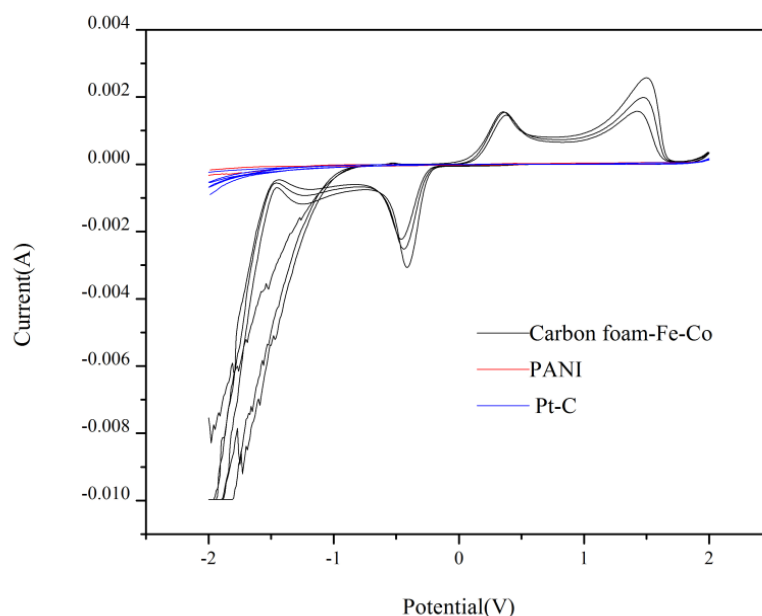

13

14 Fig.S1 The cyclic voltammograms comparison of different catalysts on glassy carbon

15 electrode in 0.1 M H<sub>2</sub>SO<sub>4</sub> sparged with O<sub>2</sub>.

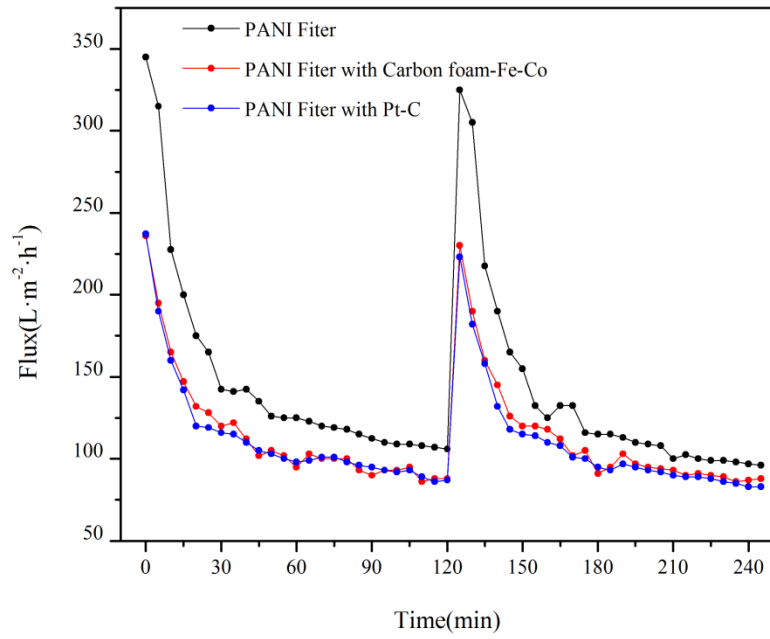

16

17 Fig.S2 The comparison of flux of the different cathode membrane electrodes in

18 filtrating Yeast suspension
